# Supplementary material
Source: PubMed Central journal article supplement (PMC3536033)
Supplement: NIHMS426231-supplement-Supplementary_Figure_1.pdf [file NIHMS426231-supplement-Supplementary_Figure_1.pdf]

## Supplemental Material

### Cadherin-11 regulates cell-cell tension necessary for calcific nodule formation by valvular myofibroblasts

Joshua D. Hutcheson<sup>1,\*</sup>, Joseph Chen<sup>1,\*</sup>, M.K. Sewell-Loftin<sup>1</sup>, Larisa M. Ryzhova<sup>1</sup>, Charles I. Fisher<sup>1</sup>, Yan Ru Su<sup>2</sup>, and W. David Merryman<sup>1,+</sup>

<sup>1</sup>Department of Biomedical Engineering, <sup>2</sup> Department of Medicine, Division of Cardiovascular Medicine, Vanderbilt University

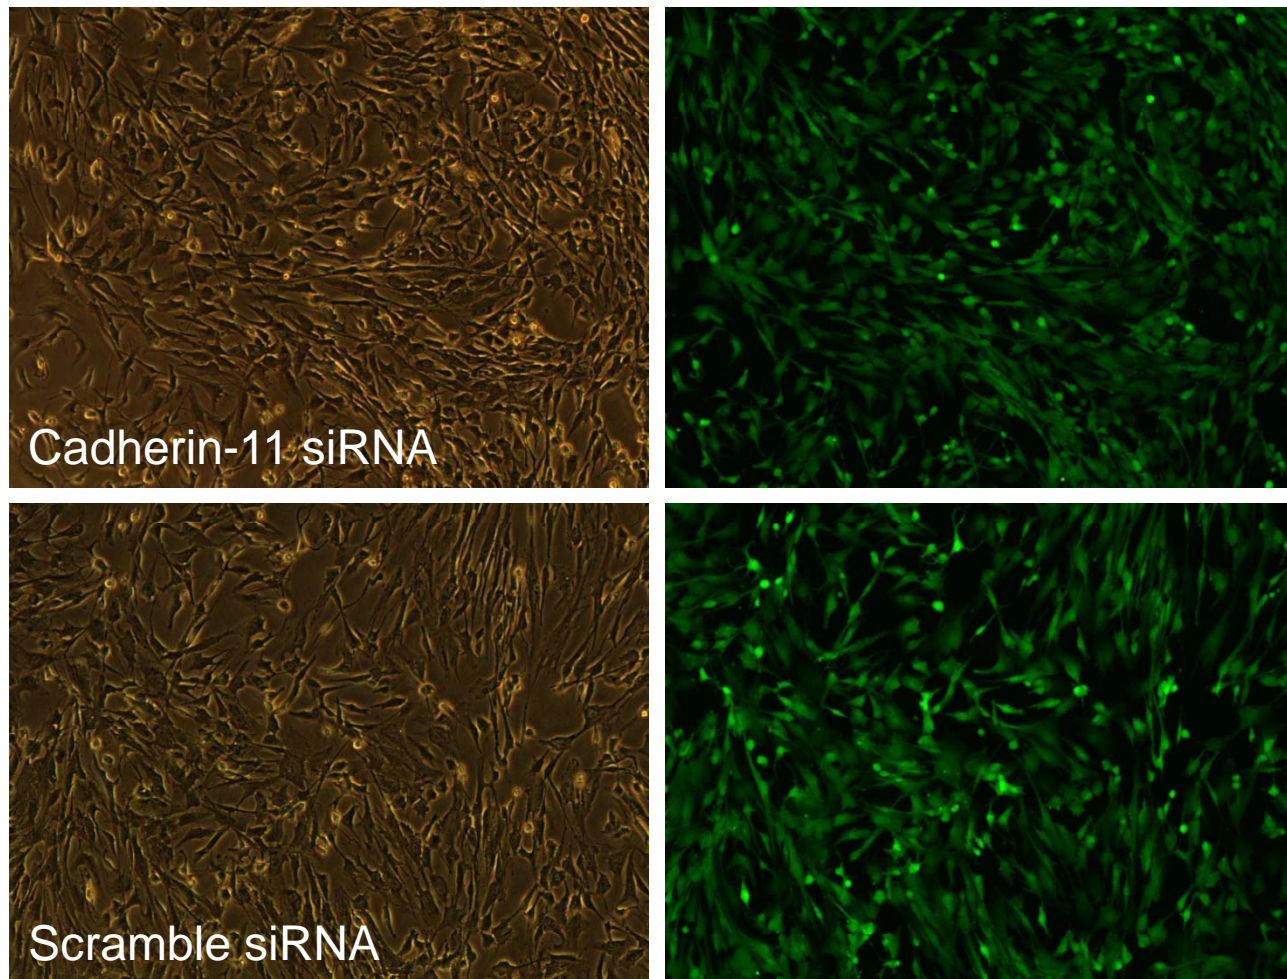

**Supplemental Figure I:** Cadherin-11 and scramble siRNA transfection does not affect cell viability as revealed by Calcein AM/Propidium Iodide staining.
